# Supplementary material
Source: MDPI journal article supplement (https://www.mdpi.com/2075-163X/11/9/924)
Supplement: s1 [file s1]

# Supplementary Material for the Manuscript “Effectiveness of Carbaryl, Carbofuran and Metolachlor Retention in Soil under the Influence of Different Colloids”

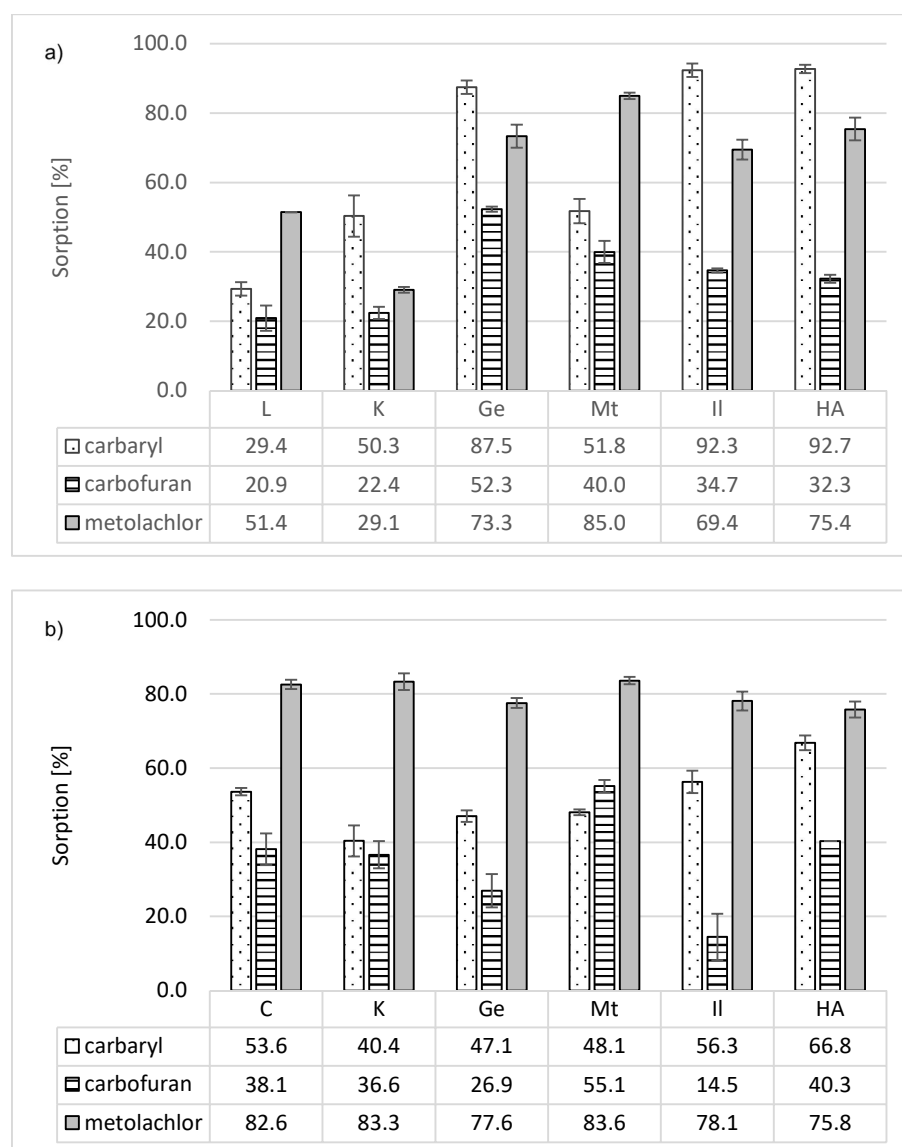

**Figure S1.** Comparison of the studied pesticides sorption on soils (a) L and (b) C.

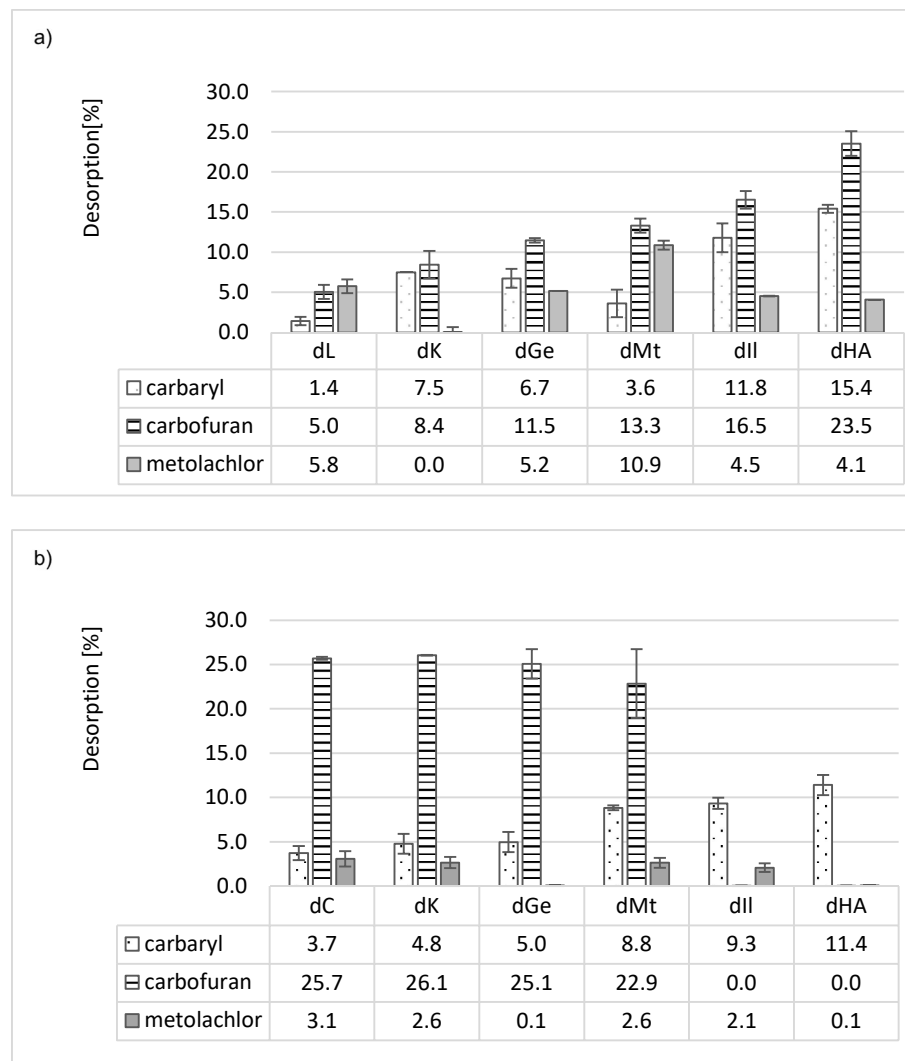

**Figure S2.** Comparison of desorption magnitude for the studied pesticides in (a) L soil and (b) C soil.
